# Supplementary material for: Isoflurane has no effect on cognitive or behavioral performance in a mouse model of early-stage Alzheimer’s disease
Source: Frontiers journal article supplement (doi:10.3389/fnins.2022.1033729), 2022-10-18
Supplement: Data_Sheet_1.PDF [file Data_Sheet_1.PDF]

## *Supplementary Material*

**Supplementary Table 1:** experimental group design

| <b>Age (months)</b> | <b>Sex</b> | <b>Genotype</b> | <b>Intervention</b> | <b>n</b> |
|---------------------|------------|-----------------|---------------------|----------|
| 10                  | Female     | WT              | Sham                | 11       |
| 10                  | Female     | WT              | Isofluran           | 10       |
| 10                  | Male       | WT              | Sham                | 10       |
| 10                  | Male       | WT              | Isofluran           | 10       |
| 10                  | Female     | Tg2576          | Sham                | 12       |
| 10                  | Female     | Tg2576          | Isofluran           | 11       |
| 10                  | Male       | Tg2576          | Sham                | 9        |
| 10                  | Male       | Tg2576          | Isofluran           | 12       |
